# Supplementary material
Source: PubMed Central journal article supplement (PMC4868765)
Supplement: NIHMS768455-supplement-1.pdf [file NIHMS768455-supplement-1.pdf]

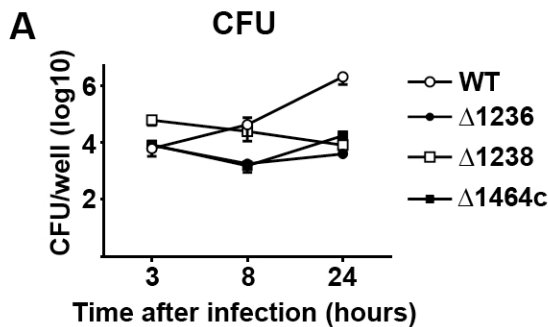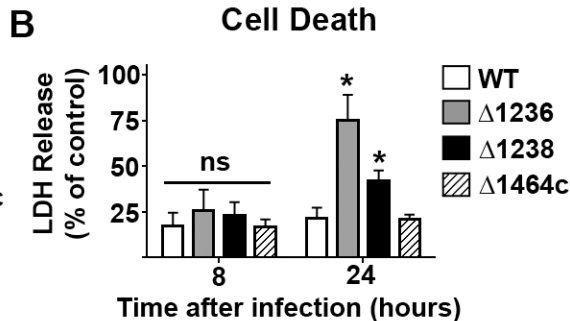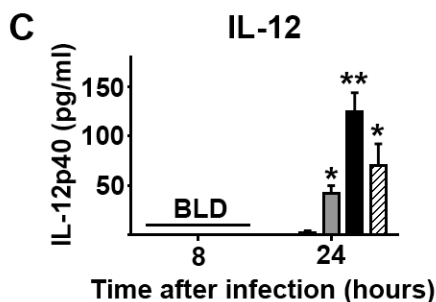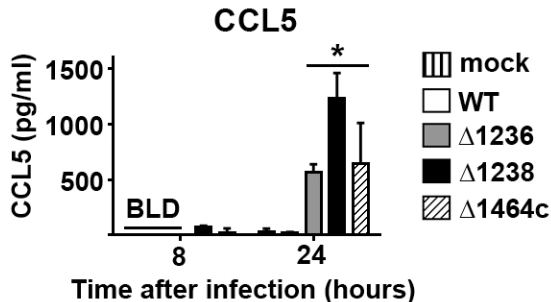

## Wyatt E et al, Supplemental Figure 1

Supplemental Figure 1. Method of infection impacts induction of host cell death triggered by capsule deficient *Francisella* in mouse cells. BMDM were infected with MOI = 50 of wild type *F. tularensis* SchuS4 (WT) or the indicated SchuS4 mutant. Macrophages and bacteria were centrifuged at 400 x g/4°C for 10 min followed by incubation at 37°C. (A) Viable intracellular bacteria were assessed at the indicated time points. (B) Cell death was quantitated using lactate dehydrogenase (LDH) release. (C) IL-12p40 and CCL5 secreted into culture supernatant was assessed 24 hours after infection. Error bars represent standard deviation (SD). BLD = below level of detection. ns = not significantly different. \* = p < 0.05 compared to uninfected (-) and WT infected cells. Data are representative of 4 experiments of similar design.
